# Supplementary material for: Li2CO3thin films fabricated by sputtering techniques: the role of temperature on their properties
Source: Royal Society of Chemistry journal article supplement (doi:10.1039/c4ce00476k), 2014-01-01
Supplement: c4ce00476k1.pdf [file c4ce00476k1.pdf]

# Li<sub>2</sub>CO<sub>3</sub> thin films fabricated by sputtering techniques: the role of temperature on their properties

Lander Rojo,<sup>\* a,b</sup> Irene Castro-Hurtado,<sup>a,b</sup> María C. Morant-Miñana,<sup>b</sup> Gemma García Mandayo<sup>a,b</sup> and Enrique Castaño<sup>a,b</sup>

5

<sup>a</sup> CEIT, Paseo Manuel de Lardizabal 15, 20018 Donostia-San Sebastián, Spain, lrojo@ceit.es

<sup>b</sup> CIC microGUNE, Goirua Kalea 9 Polo Innovación Garaia, 20500 Arrasate-Mondragón, Spain

10

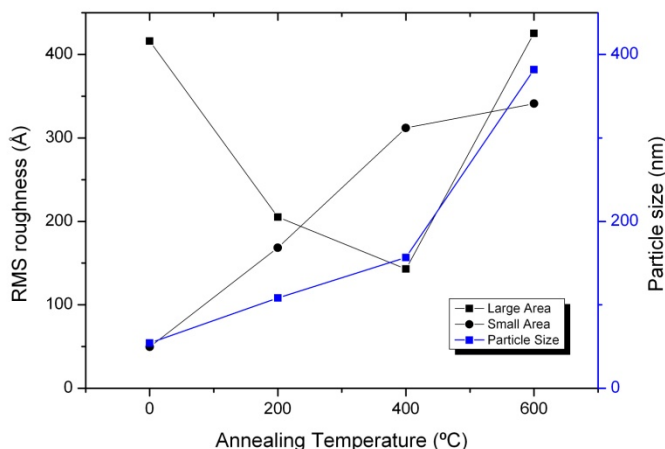

**Supporting 1.** Evolution of the RMS roughness and particle size of Li<sub>2</sub>CO<sub>3</sub> thin films with annealing temperature. The included lines in the graph try to show more clearly the evolution of the roughness and particle size with the annealing temperature.

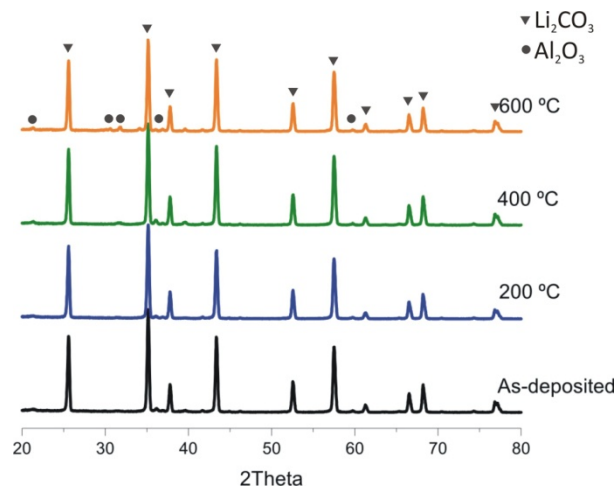

15

**Supporting 2** Complete diffraction pattern of Li<sub>2</sub>CO<sub>3</sub>.

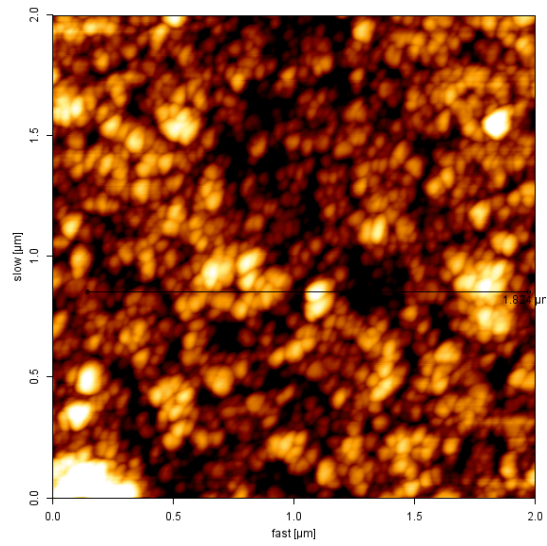

a)

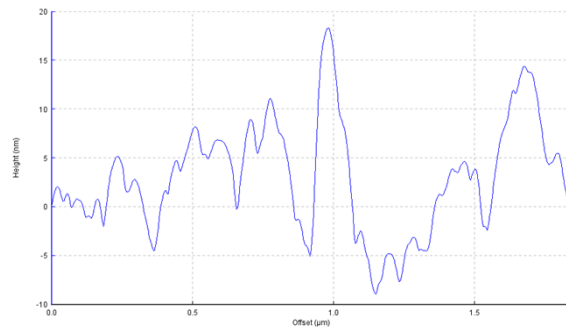

b)

5 **Supporting 3.** AFM height image and its cross section of an as deposited sample

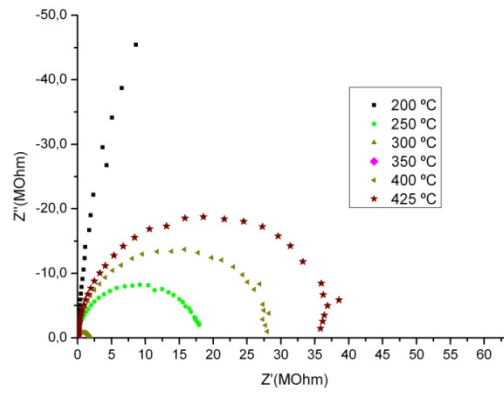

**Supporting 4**  $\text{Li}_2\text{CO}_3$  impedance spectra in the temperature range of 200 °C- 425 °C.
